# Supplementary material for: Role of the branched PEG-b-PLLA chain in morphological structures and thermodynamics for PEG-b-PLLA-g-glucose copolymers with different architectures
Source: Royal Society of Chemistry journal article supplement (doi:10.1039/d2nj05098f), 2023-01-01
Supplement: d2nj05098f1.pdf [file d2nj05098f1.pdf]

## SUPPORTING INFORMATION

# Role of the Branched PEG-b-PLLA Chain in Morphological Structures and Thermodynamics for PEG-b-PLLA-g-glucose Copolymers with Different Architectures

Mingwei Guo<sup>1\*</sup>, Wenjing Wu<sup>1</sup>, Weixin Wu<sup>1</sup>, Ruize Wang<sup>1</sup>, Qinwei Gao<sup>1,2\*</sup>

<sup>1</sup> College of Chemical Engineering, Nanjing Forestry University, Nanjing 210037, China;

<sup>2</sup> Jiangsu Key Lab for the Chemistry and Utilization of Agricultural and Forest Biomass, Nanjing Forestry University, Nanjing 210037, China.

\*Correspondence: [guomw199876@163.com](mailto:guomw199876@163.com)

\*Correspondence: [gqw@njfu.com.cn](mailto:gqw@njfu.com.cn)

## 1. Experimental Section

### 1.1 Gel Permeation Chromatography (GPC).

GPC curves were measured with Malvern Viscotek 270 by using THF as the mobile phase at 40 °C. The flow rate was 1 mL/min, and the injection volume was 100  $\mu$ L. A refractive index (RI) detector was employed to characterize the number of average molecular weight ( $M_n$ ) and molecular weight distribution ( $D$ ) through conventional calibration by using narrow-distributed polystyrene as an internal standard. The trapping experiments were conducted on Shimadzu LC20-AT Liquid Chromatograph equipped with RI and photodiode array (PDA) detectors.

### 1.2 Nuclear Magnetic Resonance (NMR).

<sup>1</sup>H-NMR spectra of copolymers were acquired using a Bruker 600 spectrometer (Bruker Biospin; AVANCE III HD; Switzerland) at 600 MHz and ambient temperature, with CDCl<sub>3</sub> and D<sub>2</sub>O as the solvent and TMS as the object of reference. The sample solutions were prepared by dissolving 10-15 mg of dried polymers in 1 mL of CDCl<sub>3</sub> or D<sub>2</sub>O.

### 1.3 Fourier Transform Infrared Spectroscopy (FTIR).

Fourier transform infrared (FTIR) spectra were measured that were equipped with a DTGS detector. The technique of attenuated total reflectance (ATR) was used for the IR measurements. The spectra were obtained by adding 64 scans at a resolution of 2 cm<sup>-1</sup>.

### 1.4 Differential Scanning Calorimetry (DSC).

DSC measurements were performed on a NETZSCH DSC-200F3 differential scanning calorimetry from the instrument (NETZSCH-Gerätebau GmbH, Selb, Germany) equipped with an IC70 intercooler. The sample sealed in an aluminum pan was first heated to 200 °C and held for 3 min to eliminate the thermal history. To investigate the melting behavior, the sample was cooled from 200 to -70 °C and then reheated to 200 °C again under a nitrogen gas flow of 60 mL/min. Both the heating rate and cooling rate were 10 °C/min. To investigate nonisothermal melt crystallization, the sample was cooled from 200 to -70 °C and then reheated to 200 °C again under a nitrogen gas flow of 60 mL/min. Both the heating rate and cooling rate were 10 °C/min.

## 2. Supplementary Discussion

The degree of polymerization (DP) of MPEG-b-PLLA-OH (1), HO-PLLA-b-PEG-b-PLLA-OH (2), MPEG-b-PLLA-COOH (3), HOOC-PLLA-b-PEG-b-PLLA-COOH (4), 1A-MPELAG (7), 1A-PELAG (8), 3A-MPELAG (9), 3A-PELAG (10), 5A-MPELAG (11), and 5A-PELAG (12) were calculated from <sup>1</sup>H NMR<sup>1,2</sup>:

$$DP_{\text{PLLA}}(\mathbf{1}) = \frac{A_{5.16 - 5.20}}{A_{5.03 - 5.07}} \quad (\text{Eq S1})$$

$$DP_{\text{PEG}}(\mathbf{1}) = \frac{A_{3.67} \times \frac{1}{4}}{A_{5.03 - 5.07}} \quad (\text{Eq S2})$$

$$DP_{\text{PLLA}}(\mathbf{2}) = \frac{A_{5.17 - 5.20}}{A_{5.04 - 5.07} \times \frac{1}{2}} \quad (\text{Eq})$$

S3)

$$DP_{PEG(2)} = \frac{A_{3.67}}{A_{5.04-5.07}} \times \frac{1}{2} \quad (\text{Eq})$$

S4)

$$DP_{PLLA(1)} = DP_{PLLA(3)} = DP_{PLLA(7)} \quad (\text{Eq S5})$$

$$DP_{PEG(1)} = DP_{PEG(3)} = DP_{PEG(7)} \quad (\text{Eq S6})$$

$$DP_{PLLA(2)} = DP_{PLLA(4)} = DP_{PLLA(8)} \quad (\text{Eq S7})$$

$$DP_{PEG(2)} = DP_{PEG(4)} = DP_{PEG(8)} \quad (\text{Eq S8})$$

$$DP_{PLLA(9)} = DP_{PLLA(1)} \times n_g(9) \quad (\text{Eq S9})$$

$$DP_{PEG(9)} = DP_{PEG(1)} \times n_g(9) \quad (\text{Eq S10})$$

$$DP_{PLLA(10)} = DP_{PLLA(2)} \times n_g(10) \quad (\text{Eq S11})$$

$$DP_{PEG(10)} = DP_{PEG(2)} \times n_g(10) \quad (\text{Eq S12})$$

$$DP_{PLLA(11)} = DP_{PLLA(1)} \times n_g(11) \quad (\text{Eq S13})$$

$$DP_{PEG(11)} = DP_{PEG(1)} \times n_g(11) \quad (\text{Eq S14})$$

$$DP_{PLLA(12)} = DP_{PLLA(2)} \times n_g(12) \quad (\text{Eq S15})$$

$$DP_{PEG(12)} = DP_{PEG(2)} \times n_g(12) \quad (\text{Eq S16})$$

where  $A_{5.03-5.07}$  and  $A_{5.17-5.20}$  are the integrals at 5.03-5.07 ppm and 5.17-5.20 ppm, respectively.

The number of graft ( $n_g$ ) of 1A-MPELAG (7), 1A-PELAG (8), 3A-MPELAG (9), 3A-PELAG (10), 5A-MPELAG (11), and 5A-PELAG (12) copolymer was calculated from  $^1\text{H}$  NMR:

$$n_g(7) = \frac{A_{3.40} \times \frac{1}{3}}{A_{5.38-5.41}} \quad (\text{Eq S17})$$

$$n_g(\mathbf{8}) = \frac{A_{5.04 - 5.07}}{A_{5.29 - 5.33}} \quad (\text{Eq S18})$$

$$n_g(\mathbf{9}) = \frac{A_{3.40} \times \frac{1}{3}}{A_{5.29 - 5.33}} \quad (\text{Eq S19})$$

$$n_g(\mathbf{10}) = \frac{A_{2.64} \times \frac{1}{4}}{A_{5.29 - 5.33}} \quad (\text{Eq S20})$$

$$n_g(\mathbf{11}) = \frac{A_{3.40} \times \frac{1}{3}}{A_{5.29 - 5.33}} \quad (\text{Eq S21})$$

$$n_g(\mathbf{12}) = \frac{A_{2.64} \times \frac{1}{4}}{A_{5.29 - 5.33}} \quad (\text{Eq S22})$$

The  $M_n$  of MPEG-b-PLLA-OH (**1**), HO-PLLA-b-PEG-b-PLLA-OH (**2**), MPEG-b-PLLA-COOH (**3**), HOOC-PLLA-b-PEG-b-PLLA-COOH (**4**), 1A-MPELAG (**7**), 1A-PELAG (**8**), 3A-MPELAG (**9**), 3A-PELAG (**10**), 5A-MPELAG (**11**), and 5A-PELAG (**12**) copolymer were calculated from  $^1\text{H}$  NMR as follows:

$$M_n(\mathbf{1}) = 14 + \text{DP}_{\text{PEG-1}} \times 62 + \text{DP}_{\text{PLLA-1}} \times 180 - (\text{DP}_{\text{PEG-1}} + \text{DP}_{\text{PLLA-1}} - 2) \times 18 \quad (\text{Eq S23})$$

$$M_n(\mathbf{2}) = \text{DP}_{\text{PEG-2}} \times 62 + \text{DP}_{\text{PLLA-2}} \times 180 - (\text{DP}_{\text{PEG-2}} + \text{DP}_{\text{PLLA-2}} - 2) \times 18 \quad (\text{Eq S24})$$

$$M_n(\mathbf{3}) = 14 + \text{DP}_{\text{PEG-3}} \times 62 + \text{DP}_{\text{PLLA-3}} \times 180 - (\text{DP}_{\text{PEG-3}} + \text{DP}_{\text{PLLA-3}} - 2) \times 18 + 100 \quad (\text{Eq S25})$$

$$M_n(\mathbf{4}) = \text{DP}_{\text{PEG-4}} \times 62 + \text{DP}_{\text{PLLA-4}} \times 180 - (\text{DP}_{\text{PEG-4}} + \text{DP}_{\text{PLLA-4}} - 2) \times 18 + 100 \times 2 \quad (\text{Eq S26})$$

$$M_n(\mathbf{7}) = 14 + \text{DP}_{\text{PEG-7}} \times 62 + \text{DP}_{\text{PLLA-7}} \times 180 - (\text{DP}_{\text{PEG-7}} + \text{DP}_{\text{PLLA-7}} - 2) \times 18 + 100 \times n_g(\mathbf{7}) + 260 \quad (\text{Eq S27})$$

$$M_n(\mathbf{8}) = \text{DP}_{\text{PEG-8}} \times 62 + \text{DP}_{\text{PLLA-8}} \times 180 - (\text{DP}_{\text{PEG-8}} + \text{DP}_{\text{PLLA-8}} - 2) \times 18 + 100 \times 2 \times n_g(\mathbf{8}) + 260 \times 2 \quad (\text{Eq S28})$$

$$M_n(\mathbf{9}) = 14 + DP_{\text{PEG-9}} \times 62 + DP_{\text{PLLA-9}} \times 180 - (DP_{\text{PEG-9}} + DP_{\text{PLLA-9-2}}) \times 18 + 100 \times n_g(\mathbf{9}) + 220 \quad (\text{Eq S29})$$

$$M_n(\mathbf{10}) = DP_{\text{PEG-10}} \times 62 + DP_{\text{PLLA-10}} \times 180 - (DP_{\text{PEG-10}} + DP_{\text{PLLA-10-2}}) \times 18 + 100 \times 2 \times n_g(\mathbf{10}) + 220 \times 3 \quad (\text{Eq S30})$$

$$M_n(\mathbf{11}) = 14 + DP_{\text{PEG-11}} \times 62 + DP_{\text{PLLA-11}} \times 180 - (DP_{\text{PEG-11}} + DP_{\text{PLLA-11-2}}) \times 18 + 100 \times n_g(\mathbf{11}) + 180 \quad (\text{Eq S31})$$

$$M_n(\mathbf{12}) = DP_{\text{PEG-12}} \times 62 + DP_{\text{PLLA-12}} \times 180 - (DP_{\text{PEG-12}} + DP_{\text{PLLA-12-2}}) \times 18 + 100 \times 2 \times n_g(\mathbf{12}) + 180 \times 5 \quad (\text{Eq S32})$$

where  $M_{n,\text{CH}_2} = 14$ ,  $M_{n,\text{SA}} = 100$ ,  $M_{n,\text{ODG}} = 260$ ,  $M_{n,\text{MG}} = 220$ ,  $M_{n,\text{Glu}} = 180$ .

The MPEG/PEG weight fraction of PEG-b-PLLA-g-glucose copolymers ( $\omega_{\text{PEG}}$ ) were determined from  $^1\text{H}$  NMR:

$$\omega_{\text{PEG}(\mathbf{1})} = \frac{DP_{\text{PEG}(1)} \times 62 + 14}{M_n(1)} \quad (\text{Eq S33})$$

$$\omega_{\text{PEG}(\mathbf{2})} = \frac{DP_{\text{PEG}(2)} \times 62}{M_n(2)} \quad (\text{Eq S34})$$

$$\omega_{\text{PEG}(\mathbf{3})} = \omega_{\text{PEG}(\mathbf{7})} = \omega_{\text{PEG}(\mathbf{9})} = \omega_{\text{PEG}(\mathbf{11})} = \frac{DP_{\text{PEG}(3)} \times 62 + 14}{M_n} \quad (\text{Eq S35})$$

$$\omega_{\text{PEG}(\mathbf{4})} = \omega_{\text{PEG}(\mathbf{8})} = \omega_{\text{PEG}(\mathbf{10})} = \omega_{\text{PEG}(\mathbf{12})} = \frac{DP_{\text{PEG}(4)} \times 62}{M_n} \quad (\text{Eq S36})$$

The PLLA weight fraction of PEG-b-PLLA-g-glucose copolymers ( $\omega_{\text{PLLA}}$ ) were determined from  $^1\text{H}$  NMR:

$$\omega_{\text{PLLA}(\mathbf{1})} = \frac{DP_{\text{PLLA}(1)} \times (180 - 18)}{M_n(1)}$$

(Eq S37)

$$\omega_{\text{PLLA}}(\mathbf{2}) = \frac{\text{DP}_{\text{PLLA}}(\mathbf{2}) \times (180 - 18)}{M_n(\mathbf{2})}$$

(Eq S38)

$$\omega_{\text{PLLA}}(\mathbf{3}) = \omega_{\text{PLLA}}(\mathbf{7}) = \omega_{\text{PLLA}}(\mathbf{9}) = \omega_{\text{PLLA}}(\mathbf{11}) = \frac{\text{DP}_{\text{PLLA}}(\mathbf{3}) \times (180 - 18)}{M_n}$$

(Eq S39)

$$\omega_{\text{PLLA}}(\mathbf{4}) = \omega_{\text{PLLA}}(\mathbf{8}) = \omega_{\text{PLLA}}(\mathbf{10}) = \omega_{\text{PLLA}}(\mathbf{12}) = \frac{\text{DP}_{\text{PLLA}}(\mathbf{4}) \times (180 - 18)}{M_n}$$

(Eq S40)

The crystallinities of  $X_{\text{PEG}}$  and  $X_{\text{PLLA}}$  in PEG-b-PLLA-g-glucose copolymers were calculated as:

$$X_{\text{PEG}} = \frac{\Delta H_{m,\text{PEG}}}{\omega_{\text{PEG}} \times 197 \text{ J/g}}$$

(Eq S41)

$$X_{\text{PLLA}} = \frac{\Delta H_{m,\text{PLLA}}}{\omega_{\text{PLLA}} \times 94 \text{ J/g}}$$

(Eq S42)

The  $\Delta H_{m,\text{PEG}}$  and  $\Delta H_{m,\text{PLLA}}$  (fusion enthalpy) were calculated from the DSC second heating thermograms, and  $X_{\text{PEG}}$  and  $X_{\text{PLLA}}$  were referred to their weight fraction. 94 J/g is the reported value of fusion enthalpy for 100% ( $\Delta H_0$ ) crystallized PLLA and 197 J/g is that for PEG<sup>3,4</sup>.

### 3. Supplementary Figures and Tables

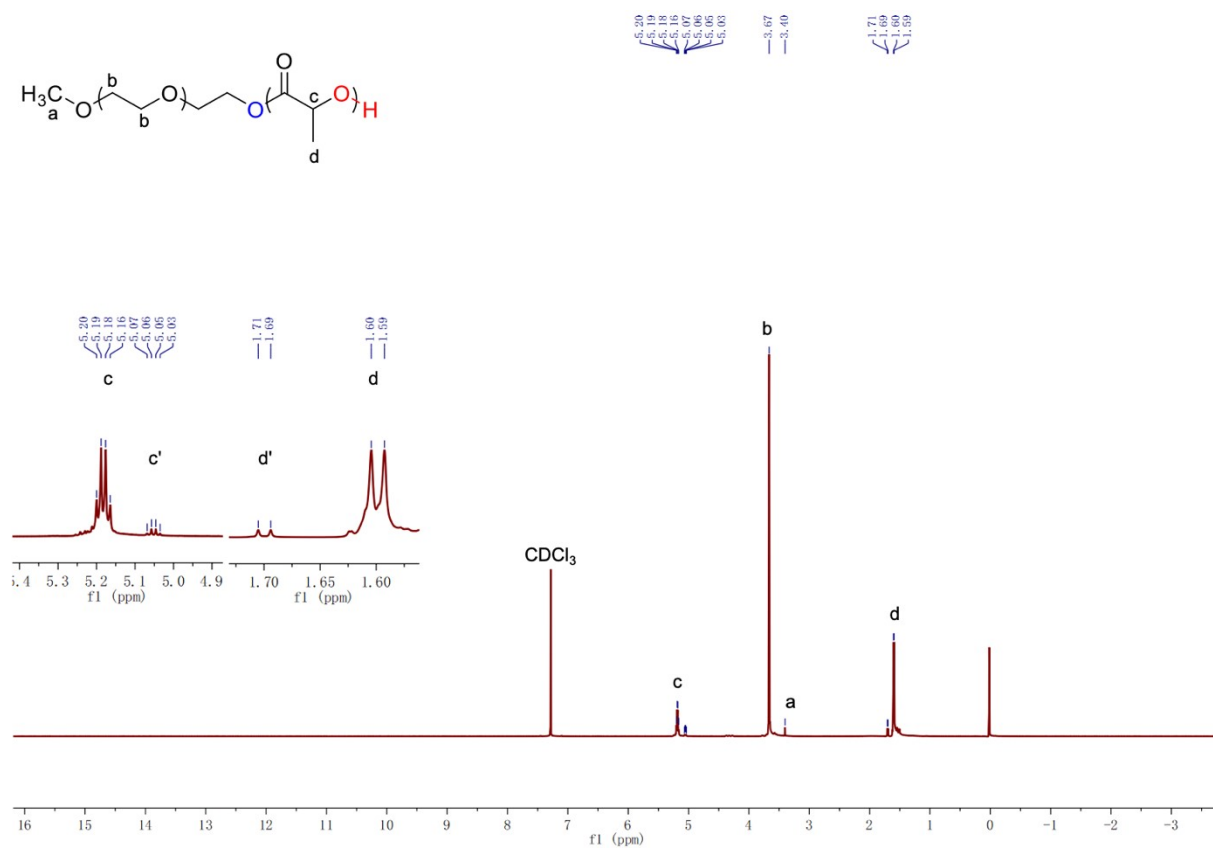

Figure S1.  $^1\text{H}$  NMR spectra of MPEG-b-PLLA-OH (1) in  $\text{CDCl}_3$ .

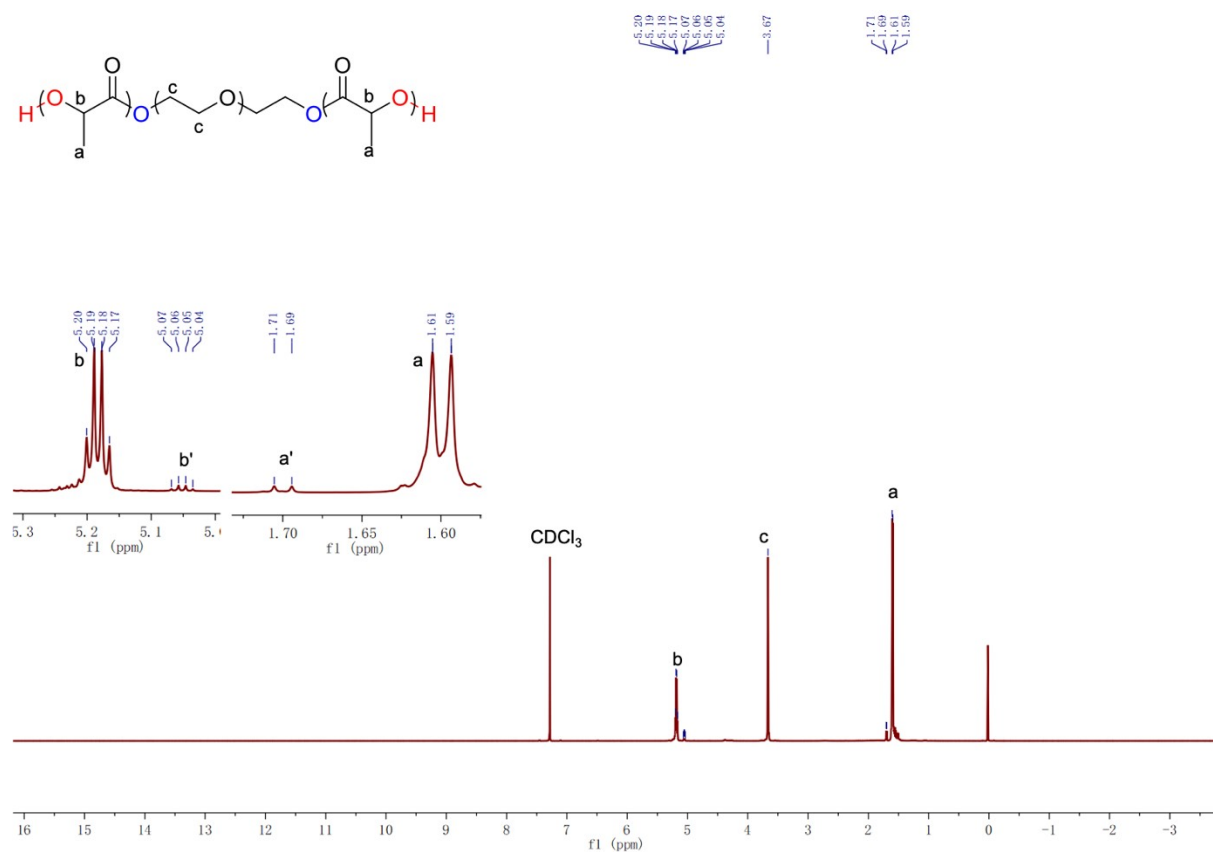

**Figure S2.**  $^1\text{H}$  NMR spectra of HO-PLLA-b-PEG-b-PLLA-OH (**2**) in  $\text{CDCl}_3$ .

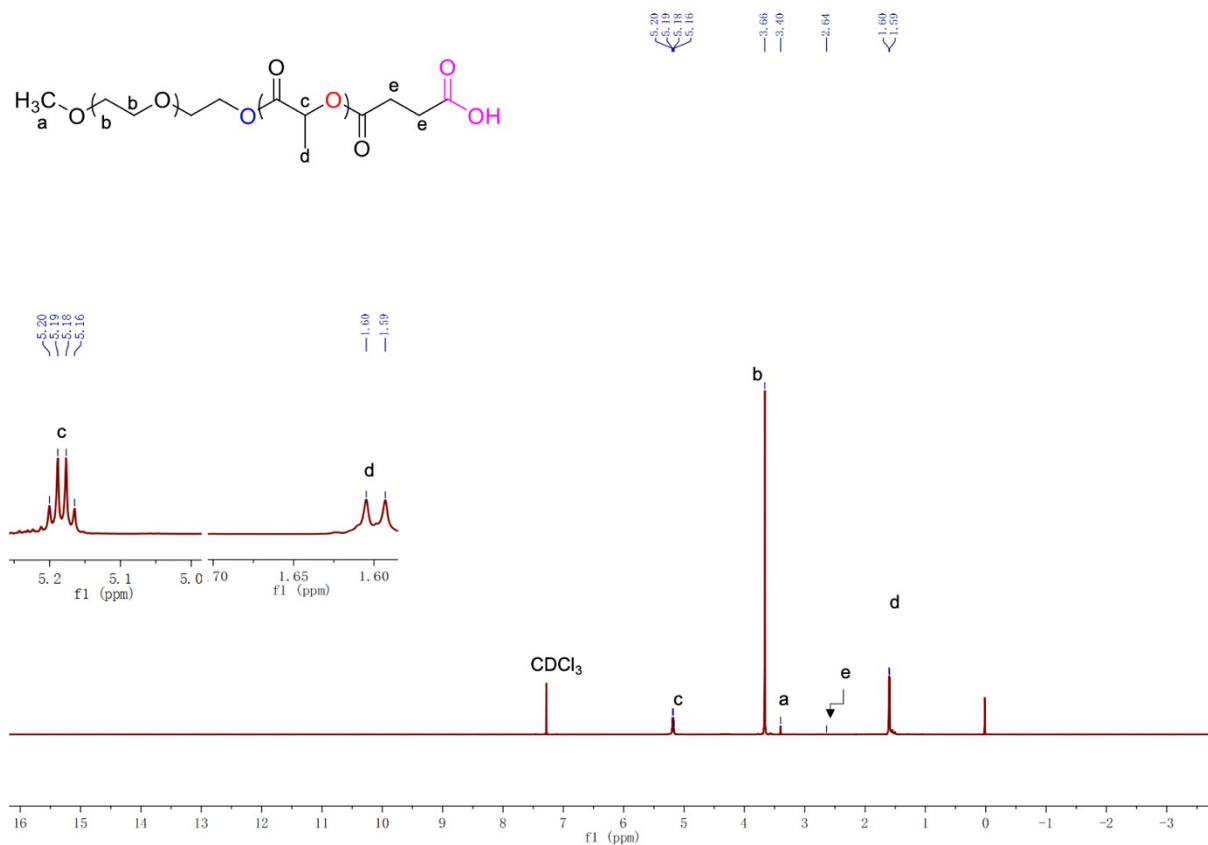

**Figure S3.**  $^1\text{H}$  NMR spectra of MPEG-b-PLLA-COOH (**3**) in  $\text{CDCl}_3$ .

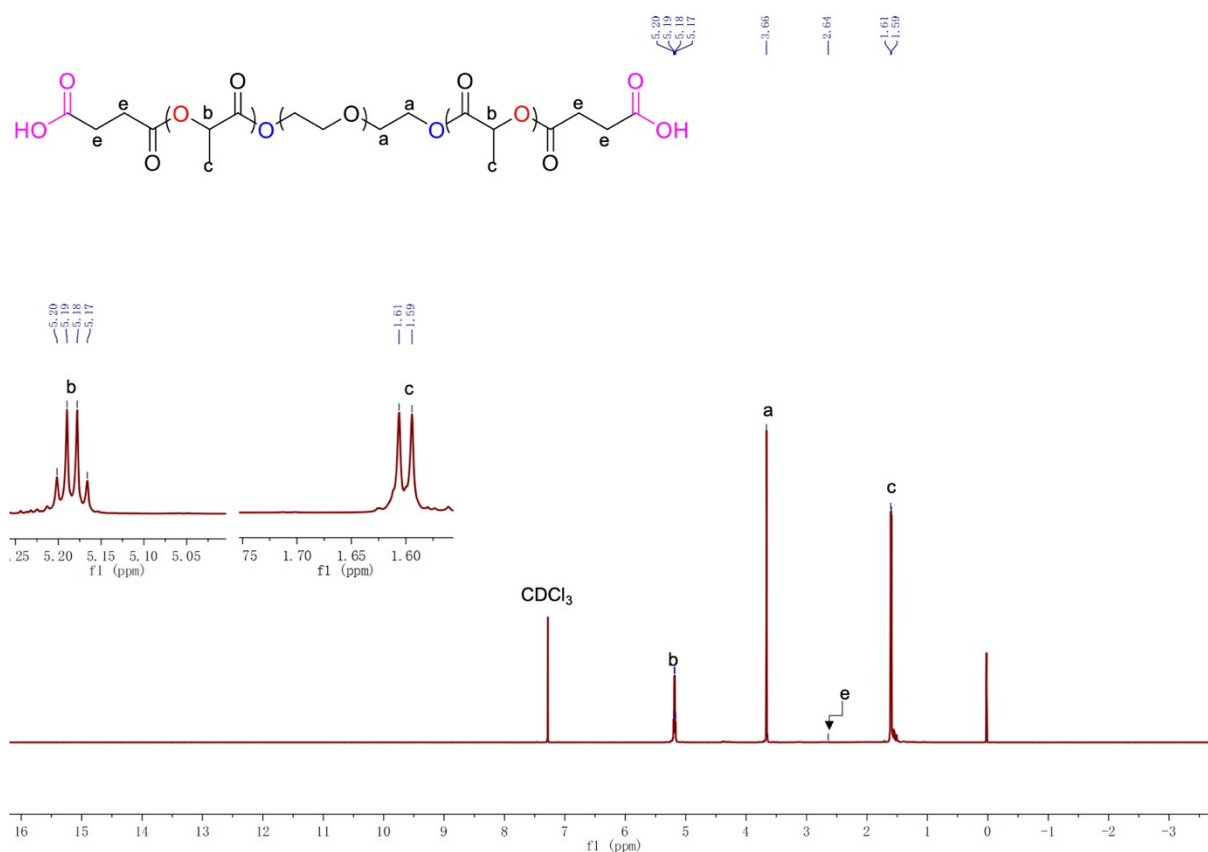

**Figure S4.**  $^1\text{H}$  NMR spectra of HOOC-PLLA-b-PEG-b-PLLA-COOH (**4**) in  $\text{CDCl}_3$ .



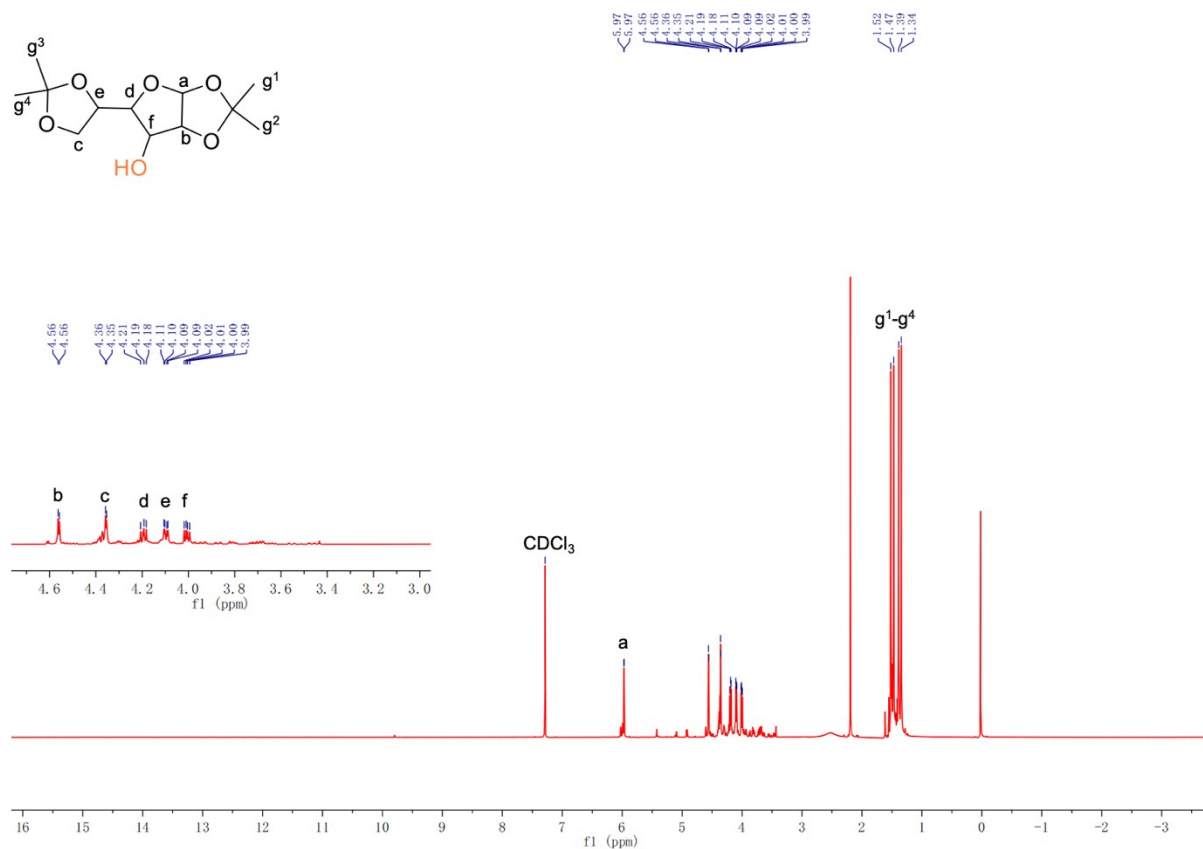

Figure S5.  $^1\text{H}$  NMR spectra of ODG (5) in  $\text{CDCl}_3$ .

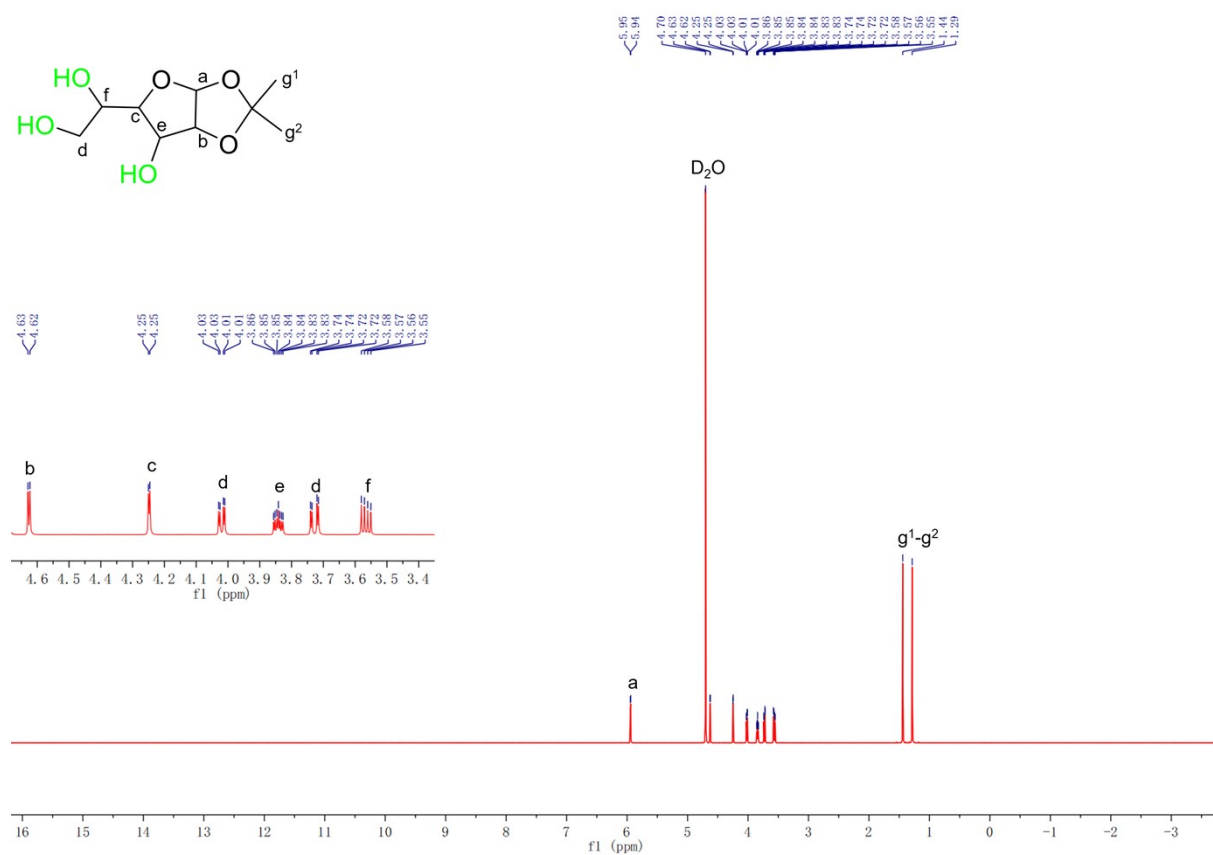

Figure S6.  $^1\text{H}$  NMR spectra of MG (6) in  $\text{D}_2\text{O}$ .

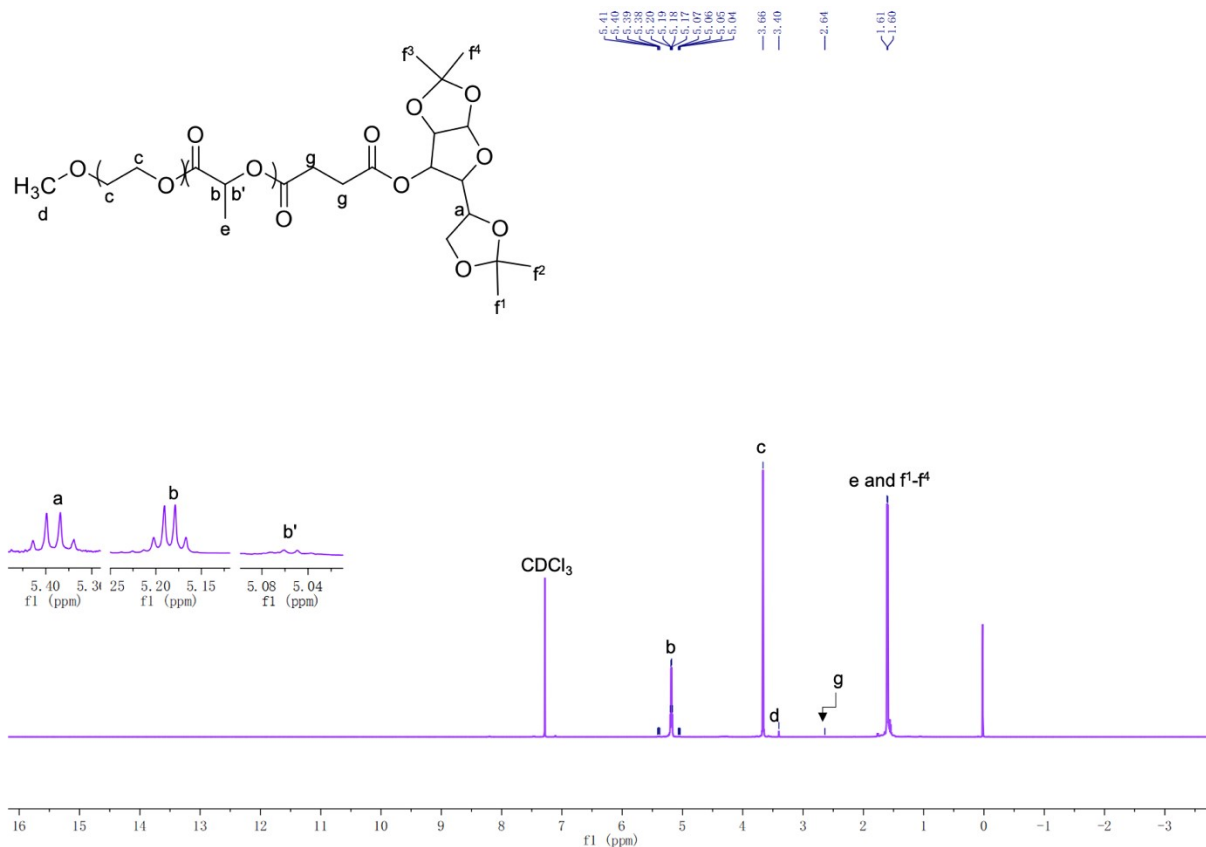

**Figure S7.**  $^1\text{H}$  NMR spectra of 1A-MPELAG (**7**) in  $\text{CDCl}_3$ .

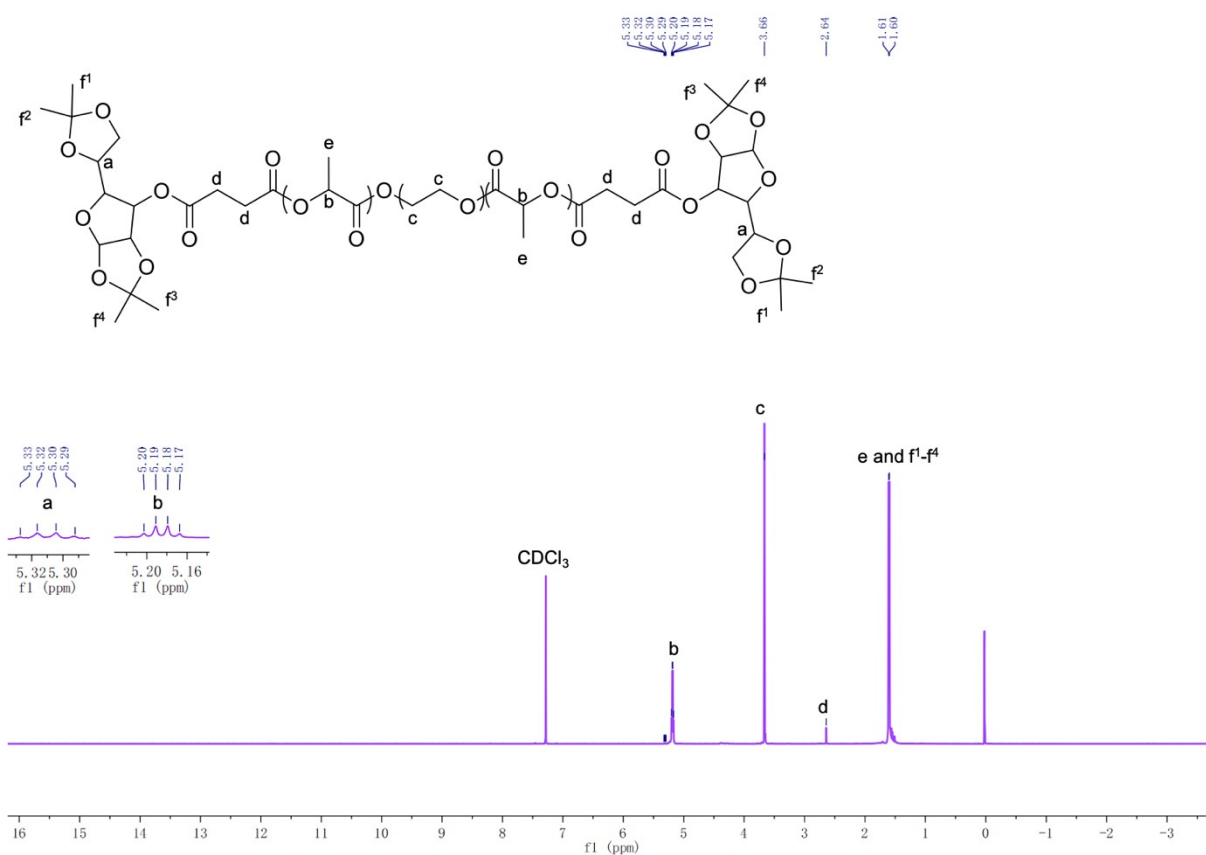

**Figure S8.**  $^1\text{H}$  NMR spectra of 1A-PELAG (**8**) in  $\text{CDCl}_3$ .

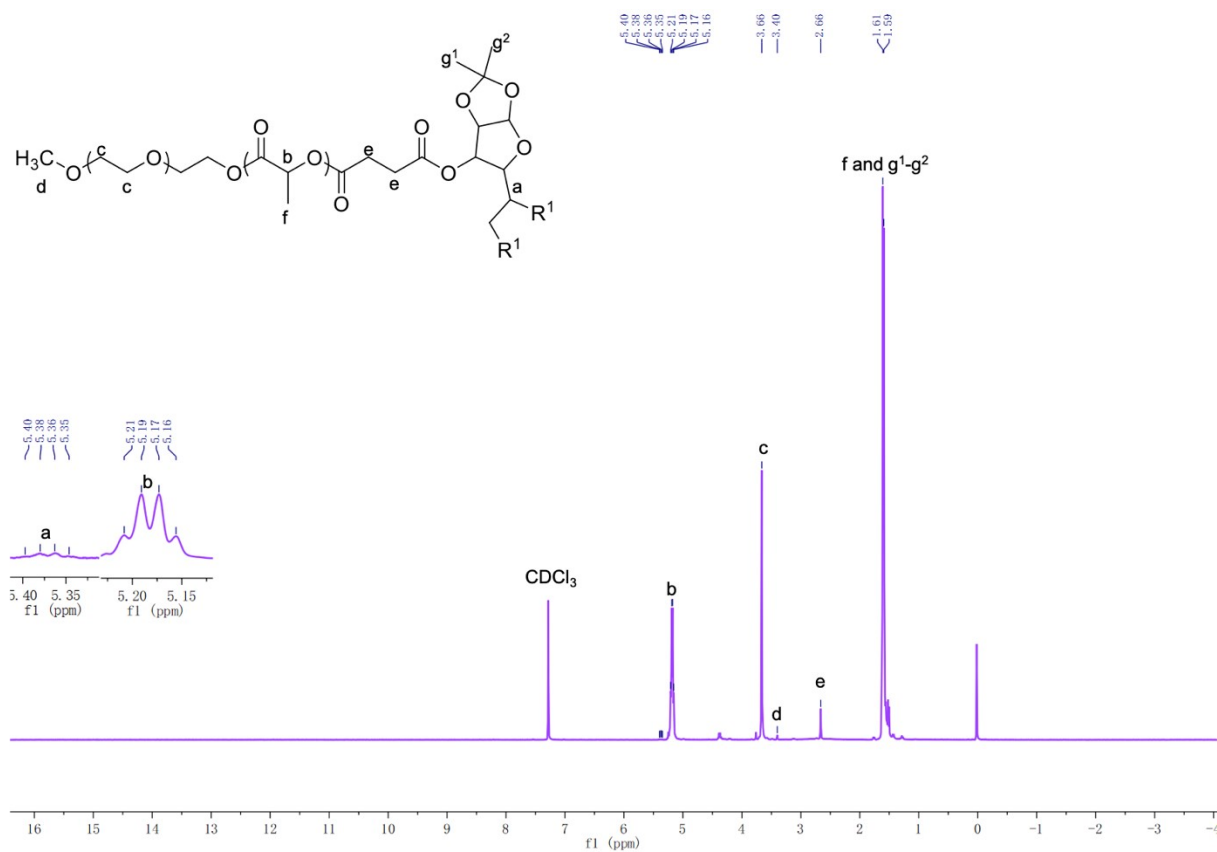

**Figure S9.**  $^1\text{H}$  NMR spectra of 3A-MPELAG (**9**) in  $\text{CDCl}_3$ .

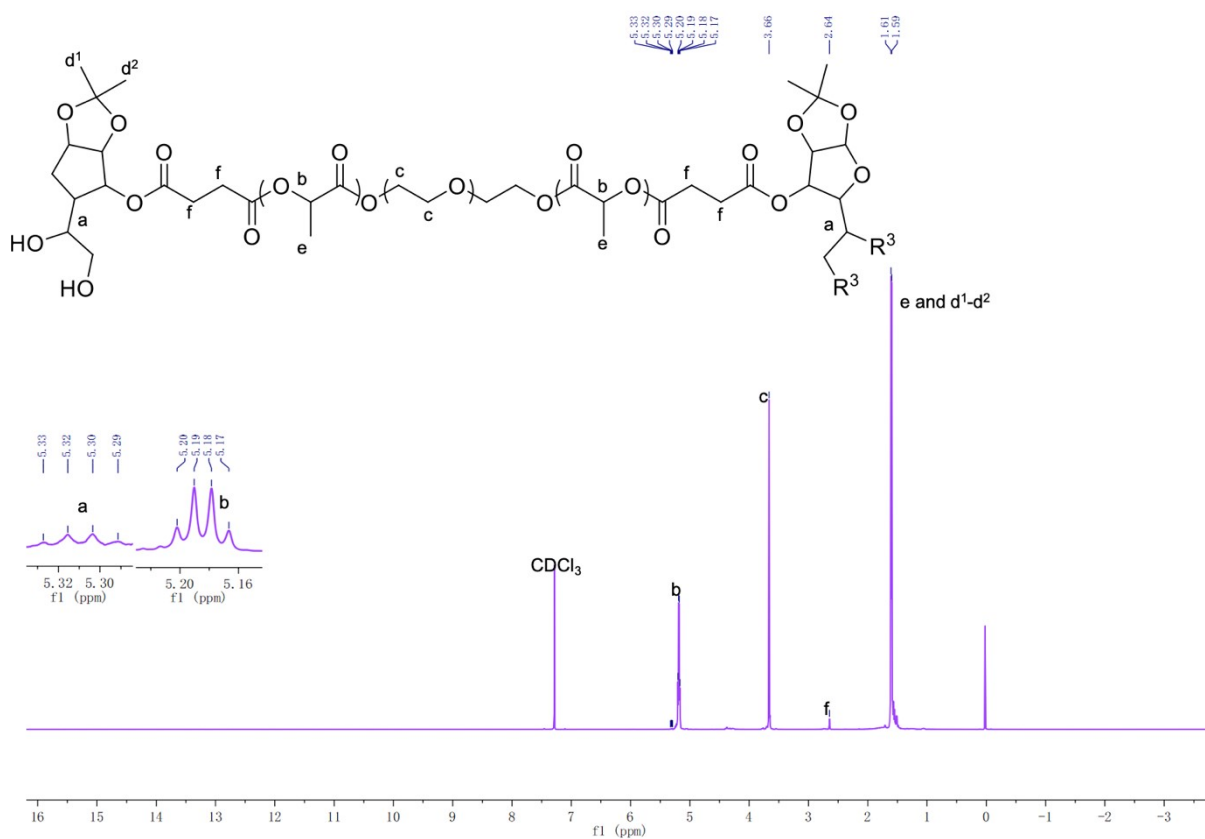

**Figure S10.**  $^1\text{H}$  NMR spectra of 3A-PELAG (**10**) in  $\text{CDCl}_3$ .

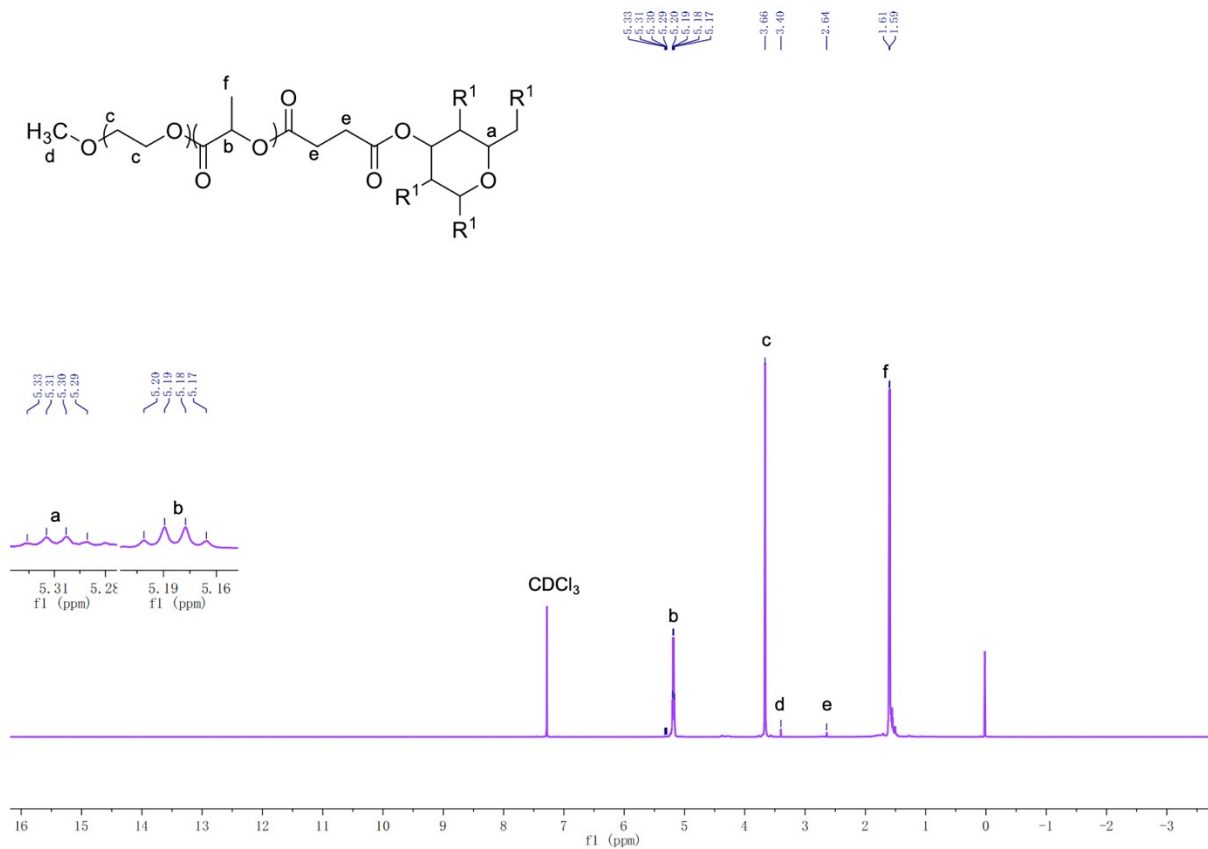

**Figure S11.**  $^1\text{H}$  NMR spectra of 5A-MPELAG (11) in  $\text{CDCl}_3$ .

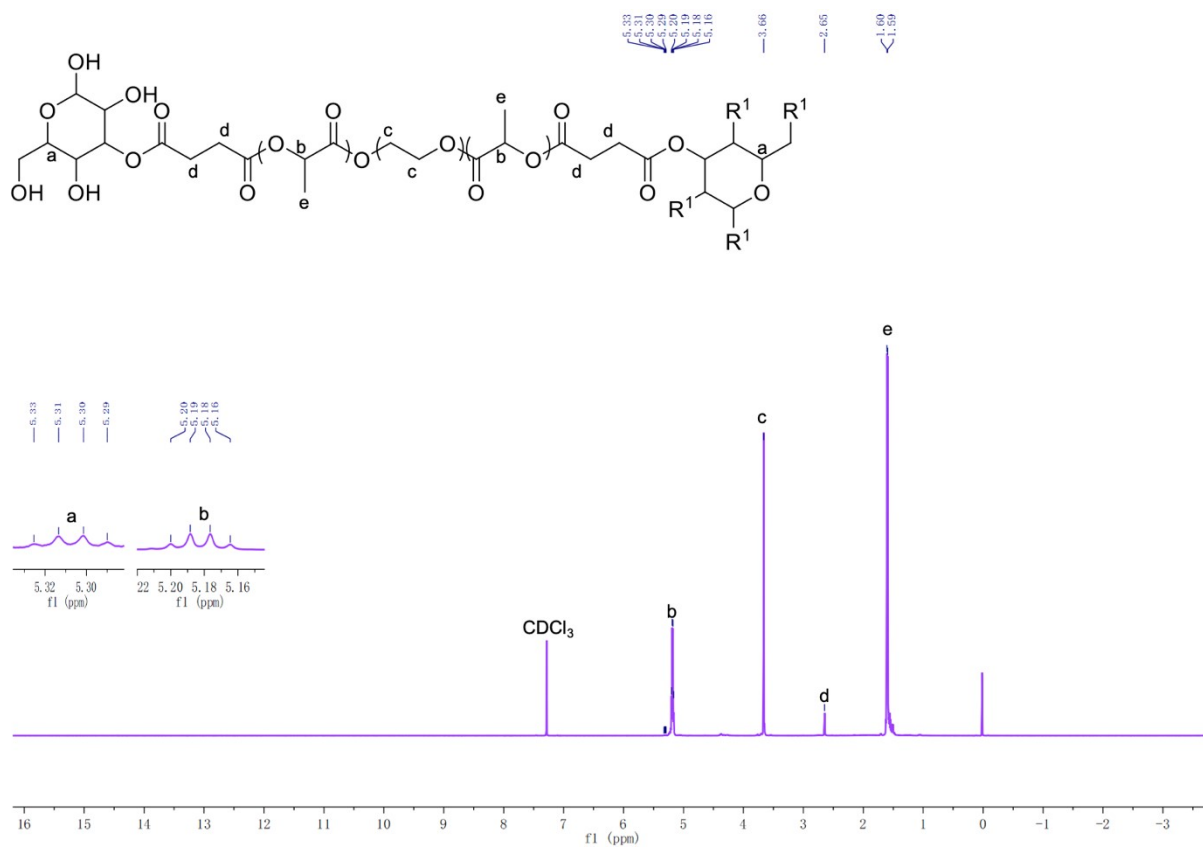

**Figure S12.**  $^1\text{H}$  NMR spectra of 5A-PELAG (12) in  $\text{CDCl}_3$ .

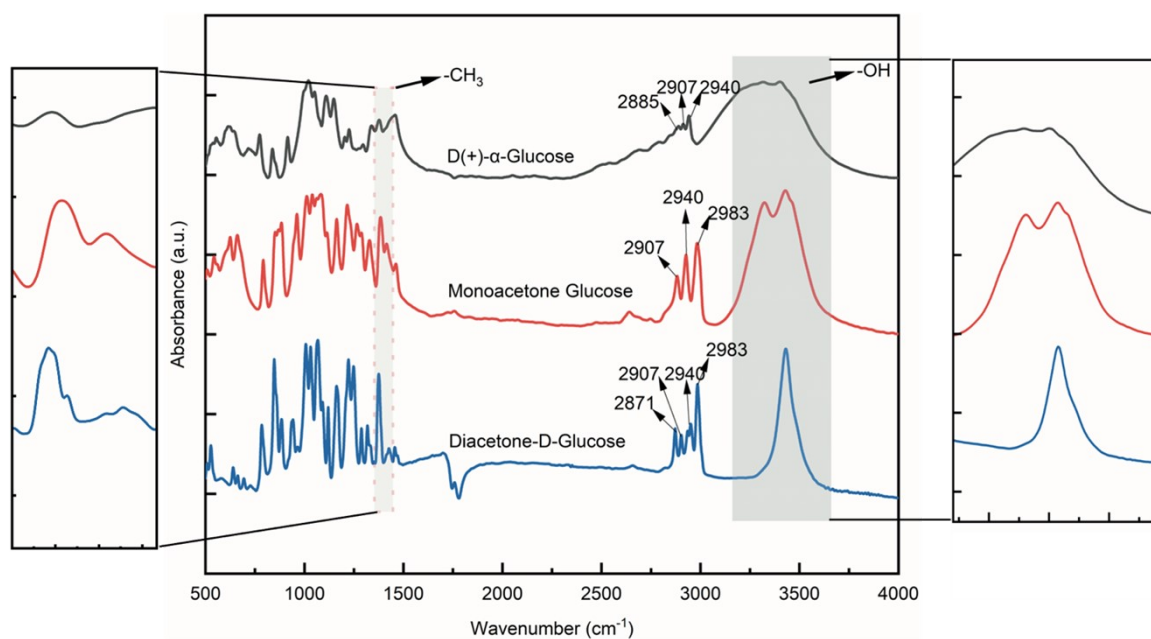

**Figure S13.** FTIR spectra of D(+)- $\alpha$ -Glucose, Monoacetone Glucose (**5**), and Diacetone-D-Glucose (**6**).

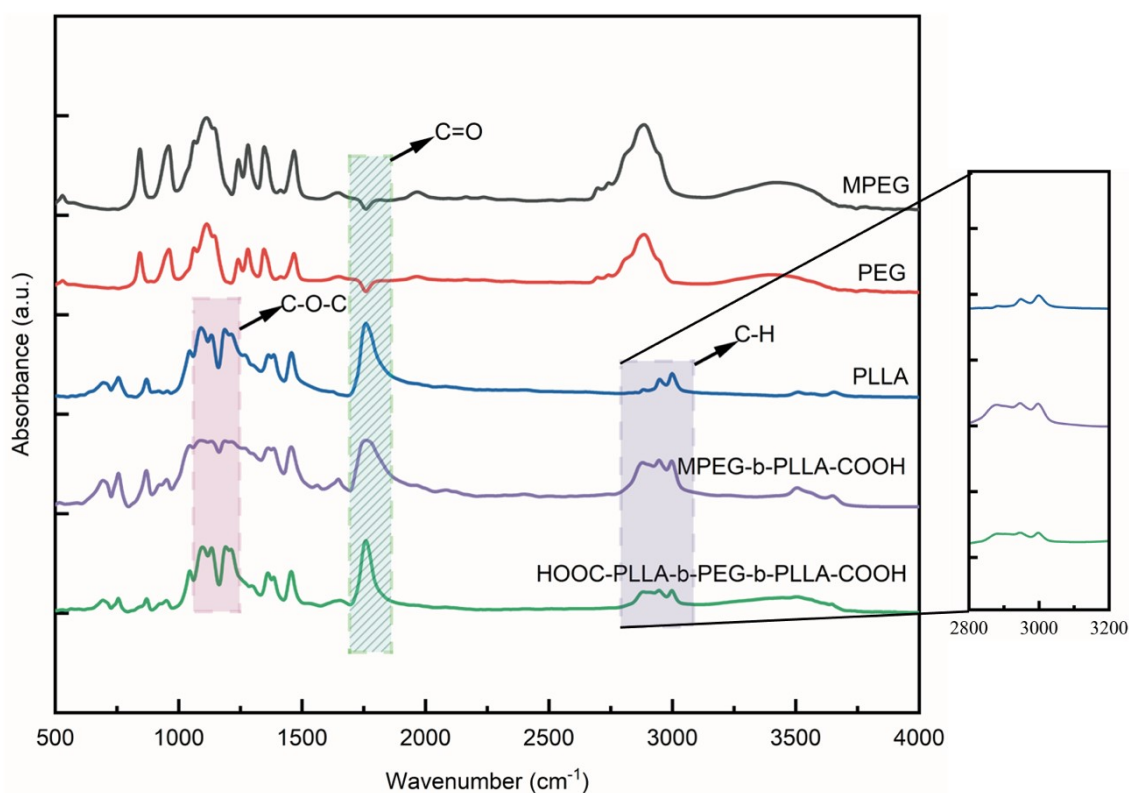

**Figure S14.** FTIR spectra of MPEG, PEG, PLLA, MPEG-b-PLLA-COOH (**3**), and HOOC-PLLA-b-PEG-b-PLLA-COOH (**4**).

**Table S1. The molecular characterization of PEG-b-PLLA-g-glucose copolymers.**

| sample | weight fraction             |                              | NMR data of samples         |                            |         |                                       | Yield <sup>g</sup> (%) |
|--------|-----------------------------|------------------------------|-----------------------------|----------------------------|---------|---------------------------------------|------------------------|
|        | $\omega_{\text{PEG}}^a(\%)$ | $\omega_{\text{PLLA}}^b(\%)$ | $\text{DP}_{\text{PLLA}}^c$ | $\text{DP}_{\text{PEG}}^d$ | $n_g^e$ | $M_n^f(\text{g}\cdot\text{mol}^{-1})$ |                        |
| 1      | 24.73                       | 75.27                        | 41                          | 49                         | —       | 8848                                  | 92.4                   |
| 2      | 13.70                       | 86.30                        | 82                          | 48                         | —       | 15432                                 | 90.0                   |
| 3      | 24.30                       | 74.43                        | 41                          | 49                         | —       | 8948                                  | 95.2                   |
| 4      | 13.63                       | 85.21                        | 82                          | 48                         | —       | 15632                                 | 97.5                   |
| 7      | 23.61                       | 72.33                        | 41                          | 49                         | 1       | 9208                                  | 86.2                   |
| 8      | 13.19                       | 82.47                        | 82                          | 48                         | 1       | 16152                                 | 88.7                   |
| 9      | 23.90                       | 73.23                        | 123                         | 147                        | 3       | 26964                                 | 80.6                   |
| 10     | 23.60                       | 72.44                        | 142                         | 170                        | 3       | 31780                                 | 84.1                   |
| 11     | 24.20                       | 74.13                        | 205                         | 245                        | 5       | 44720                                 | 79.3                   |
| 12     | 23.35                       | 72.58                        | 229                         | 271                        | 5       | 51138                                 | 82.9                   |

<sup>a</sup>The MPEG/PEG weight fraction of PEG-b-PLLA-g-glucose copolymers ( $\omega_{\text{PEG}}$ ) was calculated by Eq S33-S36. <sup>b</sup>The PLLA weight fraction of PEG-b-PLLA-g-glucose copolymers ( $\omega_{\text{PLLA}}$ ) was calculated by Eq S37. <sup>c</sup>The average degree of polymerization ( $\text{DP}_{\text{PLLA}}$ ) of PLLA, calculated from <sup>1</sup>H NMR. <sup>d</sup>The average degree of polymerization ( $\text{DP}_{\text{PEG}}$ ) of MPEG/PEG, calculated from <sup>1</sup>H NMR. <sup>e</sup>The number of graft ( $n_g$ ) of copolymers, calculated from <sup>1</sup>H NMR using Eq S17-S22. <sup>f</sup>The number-average molecular weight ( $M_n$ ) of copolymers was calculated by <sup>1</sup>H NMR from Eq S23-S32. <sup>g</sup>The yield of copolymers were calculated as follows:  $\text{yield}(\%) = M_p / (M_R - M_{\text{water}}) \times 100$ , where  $M_p$ ,  $M_{\text{water}}$ , and  $M_R$  are the weight of Products, Water, and Reactants, respectively.

#### 4. References

1. J. L. Espartero, I. Rashkov, S. M. Li, N. Manolova and M. Vert, *Macromolecules*, 1996, **29**, 3535-3539.
2. G. Wu, S. C. Chen, Q. Zhan and Y. Z. Wang, *Macromolecules*, 2011, **44**, 999-1008.
3. W. Xie, C. Jiang, X. Yu, X. Shi, S. Wang, Y. Sun, M. Yin and D. Wu, *ACS Applied Polymer Materials*, 2021, **3**, 6078-6089.
4. P. Pan, L. Han, J. Bao, Q. Xie, G. Shan and Y. Bao, *The Journal of Physical Chemistry B*, 2015, **119**, 6462-6470.
